# Supplementary material for: Association of Birth Weight with Central and Peripheral Corneal Thickness in Adulthood—Results from the Population-Based German Gutenberg Health Study
Source: MDPI journal article supplement (doi:10.3390/children8111006), 2021-11-04
Supplement: s1 [file s1]

**Supplementary Table S1.** Characteristics of the GHS study sample (2012-17) stratified for included and excluded participants (Mean  $\pm$  Standard Deviation or Median and 25%/75% Quantiles).

| Variable                          | overall            | included           | excluded         |
|-----------------------------------|--------------------|--------------------|------------------|
| Participants (n)                  | 12,423             | 5657               | 6766             |
| Sex (Women)                       | 48.8% (6065)       | 53.4% (3019)       | 45.0% (3046)     |
| Age (y)                           | 59.5 $\pm$ 10.8    | 56.0 $\pm$ 10.3    | 62.4 $\pm$ 10.5  |
| Height (cm)                       | 170 $\pm$ 10       | 171 $\pm$ 10       | 170 $\pm$ 9      |
| Weight (kg)                       | 80.1 $\pm$ 16.8    | 79.9 $\pm$ 17.2    | 80.3 $\pm$ 16.5  |
| BMI                               | 26.8 (24.1/30.2)   | 26.5 (23.7/30.0)   | 27.0 (24.4/30.3) |
| Socioeconomic status (score)      | 13.02 $\pm$ 4.44   | 13.78 $\pm$ 4.26   | 12.38 $\pm$ 4.48 |
| Birth weight (g)                  | 3408 $\pm$ 653     | 3395 $\pm$ 648     | 3456 $\pm$ 668   |
| <b>Cardiovascular parameters</b>  |                    |                    |                  |
| Hypertension (yes)                | 53.9% (6686)       | 46.6% (2632)       | 60.0% (4054)     |
| Diabetes (yes)                    | 10.6% (1313)       | 7.4% (421)         | 13.2% (892)      |
| Dyslipidemia (yes)                | 34.6% (4291)       | 29.7% (1673)       | 38.8% (2618)     |
| Smoker (yes)                      | 15.1% (1875)       | 16.7% (942)        | 13.8% (933)      |
| <b>Ocular parameters:</b>         |                    |                    |                  |
| Visual acuity OD (logMAR)         | 0.10 (0/0.20)      | 0 (0/0.20)         | 0.10 (0/0.20)    |
| Visual acuity OS (logMAR)         | 0.10 (0/0.20)      | 0 (0/0.10)         | 0 (0/0.20)       |
| Spherical equivalent OD (diopter) | -0.12 (-1.25/0.88) | -0.25 (-1.50/0.62) | 0.0 (-1.00/1.12) |
| Spherical equivalent OS (diopter) | -0.12 (-1.25/0.88) | -0.25 (-1.50/0.62) | 0.0 (-1.00/1.12) |
| Intraocular pressure OD (mmHg)    | 14.75 $\pm$ 2.96   | 14.73 $\pm$ 2.96   | 14.78 $\pm$ 2.97 |
| Intraocular pressure OS (mmHg)    | 14.84 $\pm$ 3.01   | 14.80 $\pm$ 2.95   | 14.88 $\pm$ 3.07 |
| Mean corneal radius OD (mm)       | 7.77 $\pm$ 0.28    | 7.77 $\pm$ 0.28    | 7.76 $\pm$ 0.27  |
| Mean corneal radius OS (mm)       | 7.76 $\pm$ 0.28    | 7.77 $\pm$ 0.28    | 7.75 $\pm$ 0.27  |
| White-to-white OD (mm)            | 12.2 $\pm$ 0.4     | 12.2 $\pm$ 0.4     | 12.2 $\pm$ 0.4   |
| White-to-white OS (mm)            | 12.2 $\pm$ 0.4     | 12.3 $\pm$ 0.4     | 12.2 $\pm$ 0.4   |
| Axial length OD (mm)              | 23.7 $\pm$ 1.3     | 23.8 $\pm$ 1.3     | 23.7 $\pm$ 1.2   |
| Axial length OS (mm)              | 23.7 $\pm$ 1.3     | 23.8 $\pm$ 1.3     | 23.6 $\pm$ 1.2   |

n—number of participants, cm—centimeter, kg—kilogram; g—gram; mm—millimeter; OD—right eye; OS—left eye.
